# Supplementary material for: Crystalline organic thin films for crystalline OLEDs (II): weak epitaxy growth of phenanthroimidazole derivatives
Source: Royal Society of Chemistry journal article supplement (doi:10.1039/d3ra03095d), 2023-01-01
Supplement: d3ra03095d1.pdf [file d3ra03095d1.pdf]

## 1 **Supplementary Information**

### 2 **Crystalline organic thin films for crystalline OLEDs (II): weak epitaxy growth of** 3 **phenanthroimidazole derivatives**

4 Dan Liu<sup>1,2</sup>, Feng Zhu<sup>1,2\*</sup>, Donghang Yan<sup>1,2</sup>

5 <sup>1</sup>State Key Laboratory of Polymer Physics and Chemistry, Changchun Institute of  
6 Applied Chemistry, Chinese Academy of Sciences, Changchun 130022, China.

7 <sup>2</sup>School of Applied Chemistry and Engineering, University of Science and Technology  
8 of China, Hefei 230026, China.

9 \*Corresponding author. Email: [zhufeng@ciac.ac.cn](mailto:zhufeng@ciac.ac.cn)

10

#### 11 **Contents:**

12 **1. Morphologies of BP1T films grown at different substrate temperatures**

13 **2. Morphologies of different thicknesses BP1T**

14 **3. Width of 2FPPIcZ strip-like crystal on BP1T**

15 **4. Height of 2FPPIcZ crystals on double-layer BP1T**

16 **5. Morphologies of different thicknesses 2FPPIcZ before and after annealing**

17 **6. Morphologies of different thicknesses 2FPPIcZ on BP1T**

18 **7. Optical properties of 2FPPIcZ crystalline film**

19

20

21 **1. Morphologies of BP1T films grown at different substrate temperatures**

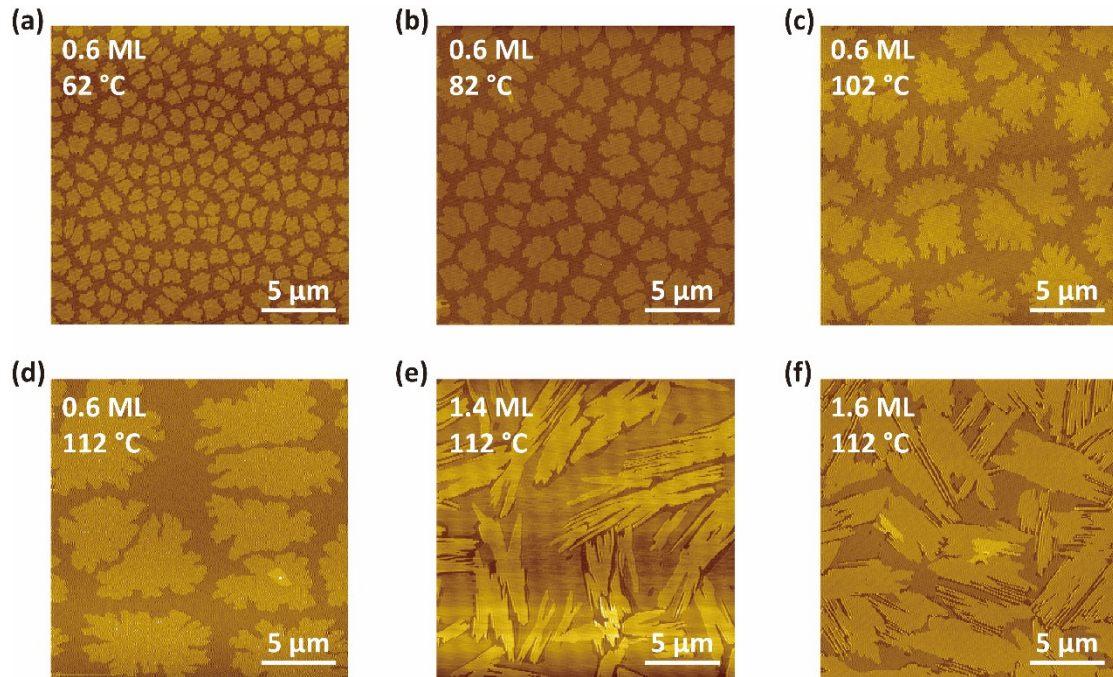

22

23 **Fig. S1** AFM images of BP1T films grown at different substrate temperatures. (a-d) 0.6  
24 ML BP1T grown at 62 °C (a), 82 °C (b), 102 °C (c), and 112 °C (d). (e-f) 1.4 ML (e) and  
25 1.6 ML (f) BP1T grown at 112 °C.

26

27 **2. Morphologies of different thicknesses BP1T**

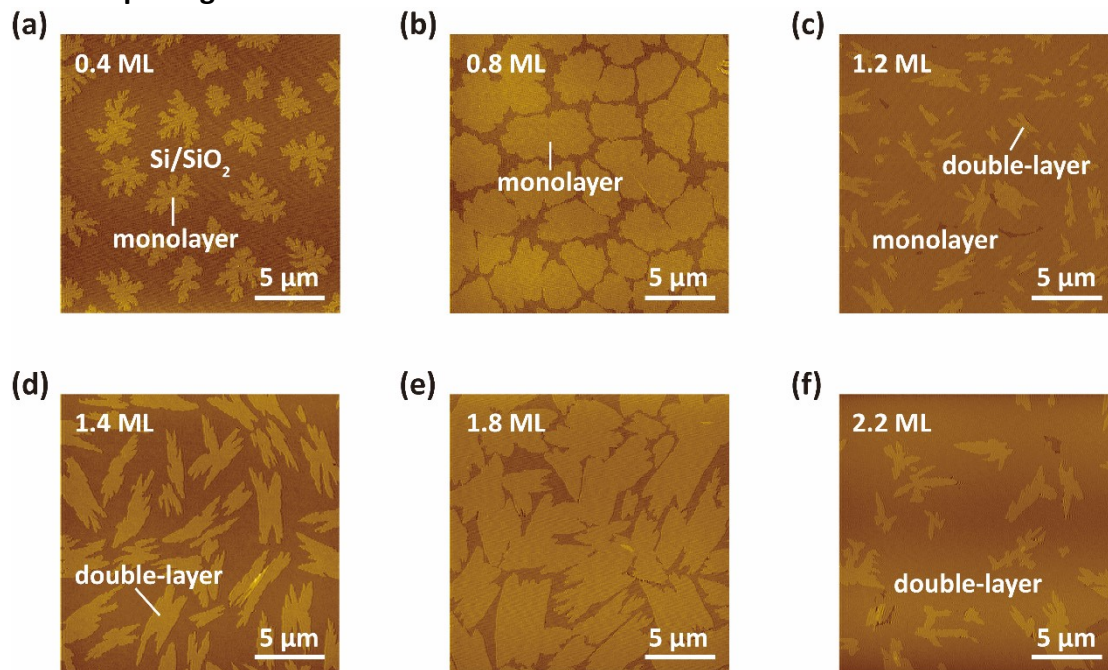

28

29 **Fig. S2** AFM images of 0.4 (a), 0.8 (b), 1.2 (c), 1.4 (d), 1.8 (e), and 2.2 (f) monolayer  
30 BP1T films at the substrate temperature of 102 °C.

31

32 **3. Width of 2FPPIcz strip-like crystal on BP1T**

(a) **1.2 ML BP1T / 20 nm 2FPPIcz**

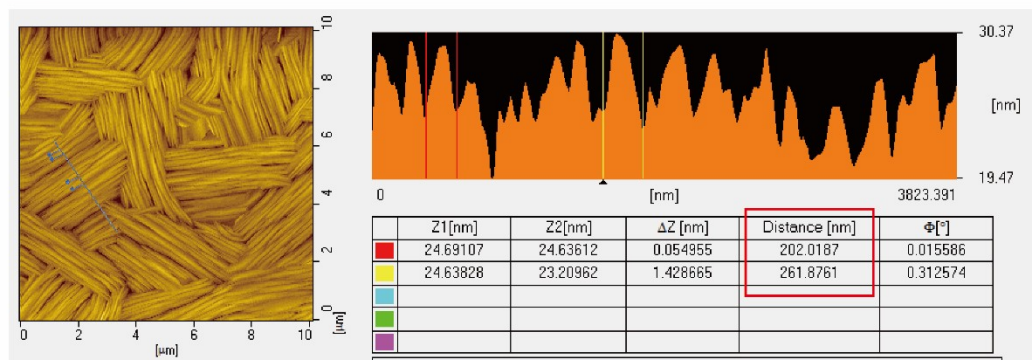

(b) **2.2 ML BP1T / 20 nm 2FPPIcz**

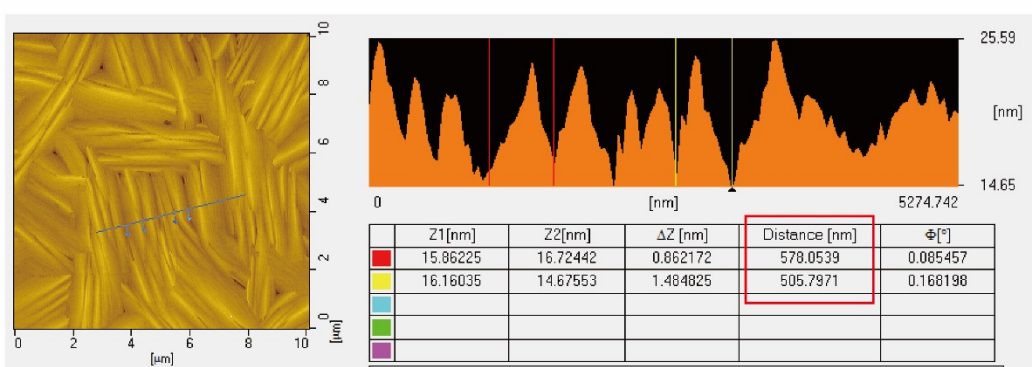

33

34 **Fig. S3** (a-b) Width of 2FPPIcz strip-like crystals grown on 1.2 (a) and 2.2 (b) monolayer  
 35 BP1T.

36

37 **4. Height of 2FPICz crystals on double-layer BP1T**

(a)

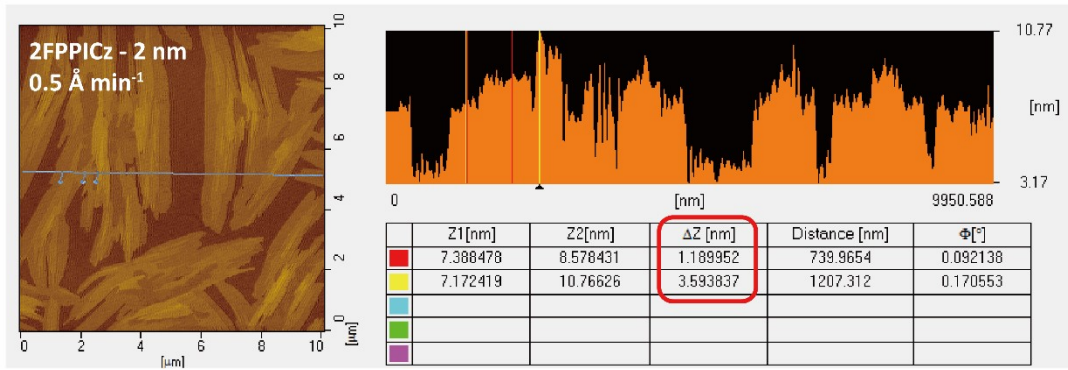

38

39 **Fig. S4** Height map of 2-nm thick 2FPICz thin film deposited on 2.2-monolayer BP1T.

40

41 **5. Morphologies of different thicknesses 2FPPIcZ before and after annealing**

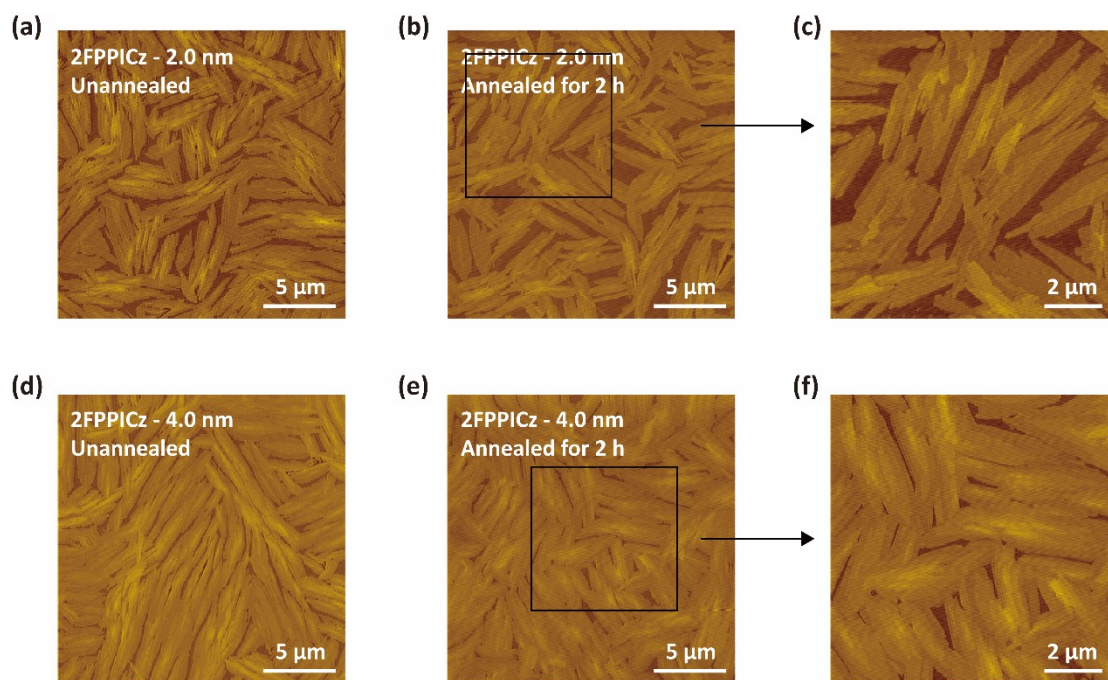

42

43 **Fig. S5** (a and b) AFM images of unannealing (a) and annealing for 2 hours (b) 2.0-nm  
44 thick 2FPPIcZ thin film. (d and e) AFM images of unannealing (d) and annealing for 2  
45 hours (e) 4.0-nm thick 2FPPIcZ thin film. (c and f) The corresponding zoom images of  
46 (b) and (e).

47

48 **6. Morphologies of different thicknesses 2FPPIcZ on BP1T**

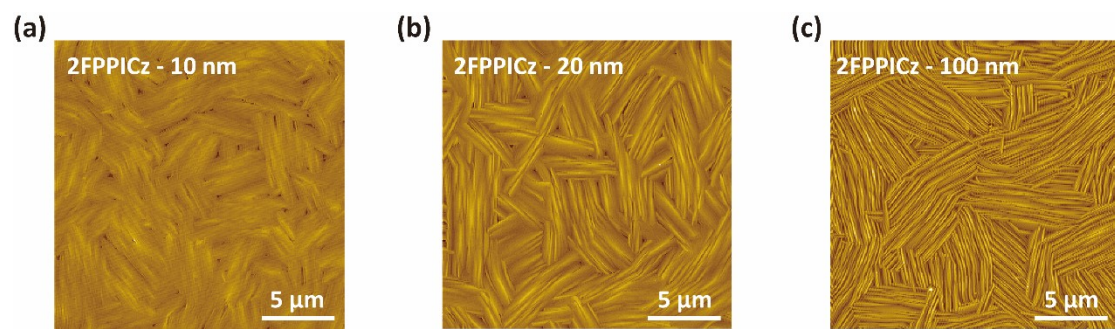

**Fig. S6** Morphologies of 2FPPIcZ with different thicknesses on BP1T. The AFM images of different thicknesses of 10 nm (a), 20 nm (b), and 30 nm (c).

53 **7. Optical properties of 2FPPIcZ crystalline film**

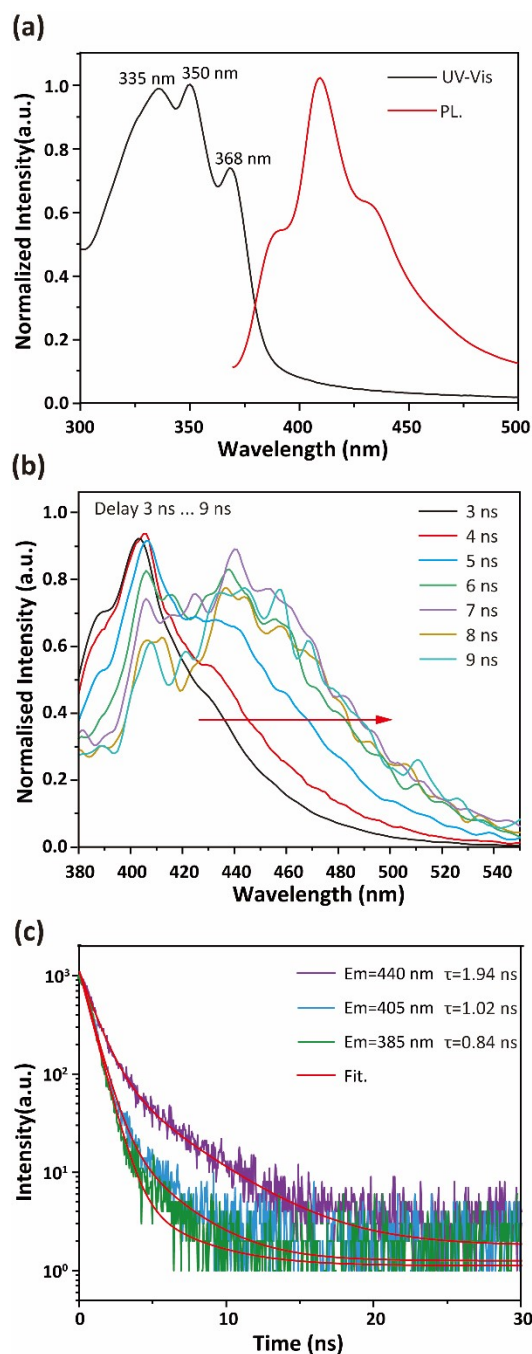

54

55 **Fig. S7** Optical properties of 2FPPIcZ crystalline film. (a) Normalized ultraviolet-visible  
 56 (UV-vis) absorption and photoluminescence (PL) spectrum of 2FPPIcZ crystalline thin  
 57 film from [J. Mater. Chem. C, 2021, 9, 2236-2242]. (b) Time-resolved  
 58 photoluminescence spectra of 40 nm-thick 2FPPIcZ crystalline thin film. (c) Transient  
 59 decay curves of 40 nm-thick 2FPPIcZ crystalline thin film.

60



61 **Table S1** Fluorescence lifetimes ( $\tau$ ) of 2FPPI Cz crystalline film depend on wavelength.

| Em (nm) | A <sub>1</sub> | $\tau_1$ (ns) | A <sub>2</sub> | $\tau_2$ (ns) |
|---------|----------------|---------------|----------------|---------------|
| 385     | 1148.42        | 0.74          | 8.7            | 3.56          |
| 405     | 1032.68        | 0.75          | 36.49          | 2.98          |
| 440     | 1025.86        | 0.97          | 122.11         | 3.94          |

62
